# Supplementary material
Source: MDPI journal article supplement (https://www.mdpi.com/2073-445X/12/4/929)
Supplement: s1 [file s1 › land-2292633-supplementary.pdf]

**Supplementary Materials:**

**Table S1.** The weight and maximum influence distance of threat sources.

| THREAT      | MAX_DIST/km | WEIGHT | DECAY       |
|-------------|-------------|--------|-------------|
| Agriculture | 3           | 0.5    | Linear      |
| Constructed | 10          | 0.9    | Exponential |
| Bare        | 4           | 0.4    | Linear      |

**Table S2.** Sensitivity of each land use type to threat factors.

| Land use type | Habitat | Sensitivity |             |      |
|---------------|---------|-------------|-------------|------|
|               |         | Agriculture | Constructed | Bare |
| Agriculture   | 0.5     | 0           | 0.5         | 0.4  |
| Forests       | 1       | 0.3         | 0.6         | 0.4  |
| Grass         | 0.8     | 0.4         | 0.7         | 0.2  |
| Open Water    | 0.9     | 0.1         | 0.2         | 0.1  |
| Constructed   | 0       | 0           | 0           | 0.8  |
| Bare          | 0.2     | 0.5         | 0.5         | 0    |
